# Supplementary material
Source: PubMed Central journal article supplement (PMC6685438)
Supplement: NIHMS1029018-supplement-Table1.pdf [file NIHMS1029018-supplement-Table1.pdf]

supplemental table 1

| <b>Nutrition</b> | <b>Nutrition_label</b>                                                              | <b>Hazard_Ratio_CI</b> | <b>p_val</b> | <b>ad_pval</b> |
|------------------|-------------------------------------------------------------------------------------|------------------------|--------------|----------------|
| <b>sfa180</b>    | SFA 18:0<br>(stearic acid)                                                          | 1.23 [1.10, 1.37]      | < 0.001      | 0.036          |
| <b>tfa181t</b>   | TRANS 18:1<br>(trans-octadecenoic acid [elaidic acid])                              | 1.21 [1.08, 1.35]      | < 0.001      | 0.0387         |
| <b>totaltfa</b>  | Total Trans-Fatty Acids<br>(TRANS)                                                  | 1.21 [1.08, 1.35]      | < 0.001      | 0.0387         |
| <b>tfa161t</b>   | TRANS 16:1<br>(trans-hexadecenoic acid)                                             | 1.20 [1.07, 1.34]      | 0.0012       | 0.0393         |
| <b>sfatot</b>    | Total Saturated Fatty Acids<br>(SFA)                                                | 1.19 [1.07, 1.32]      | 0.0018       | 0.0473         |
| <b>sfa160</b>    | SFA 16:0<br>(palmitic acid)                                                         | 1.17 [1.05, 1.30]      | 0.0049       | 0.1092         |
| <b>sfa170</b>    | SFA 17:0<br>(margaric acid)                                                         | 1.16 [1.04, 1.29]      | 0.0061       | 0.1153         |
| <b>gammtoco</b>  | Gamma-Tocopherol                                                                    | 1.15 [1.04, 1.28]      | 0.0082       | 0.1356         |
| <b>tfa182t</b>   | TRANS 18:2<br>(trans-octadecadienoic acid [linolelaidic acid]; incl. c-t, t-c, t-t) | 1.15 [1.03, 1.28]      | 0.0111       | 0.1458         |
| <b>sfa60</b>     | SFA 6:0<br>(caproic acid)                                                           | 1.14 [1.03, 1.27]      | 0.0121       | 0.1458         |
| <b>mfa181</b>    | MUFA 18:1<br>(oleic acid)                                                           | 1.15 [1.03, 1.27]      | 0.0131       | 0.1458         |
| <b>sfa100</b>    | SFA 10:0<br>(capric acid)                                                           | 1.14 [1.03, 1.27]      | 0.0142       | 0.1458         |
| <b>sfa140</b>    | SFA 14:0<br>(myristic acid)                                                         | 1.14 [1.03, 1.27]      | 0.0143       | 0.1458         |
| <b>mfatot</b>    | Total Monounsaturated Fatty Acids<br>(MUFA)                                         | 1.14 [1.03, 1.27]      | 0.0159       | 0.1511         |
| <b>cholest</b>   | Cholesterol                                                                         | 1.13 [1.02, 1.26]      | 0.0227       | 0.1906         |
| <b>sfa120</b>    | SFA 12:0<br>(lauric acid)                                                           | 1.13 [1.02, 1.26]      | 0.0229       | 0.1906         |

|                 |                                             |                   |        |        |
|-----------------|---------------------------------------------|-------------------|--------|--------|
| <b>sfa80</b>    | SFA 8:0<br>(caprylic acid)                  | 1.13 [1.01, 1.25] | 0.0269 | 0.2105 |
| <b>sfa40</b>    | SFA 4:0<br>(butyric acid)                   | 1.12 [1.00, 1.24] | 0.0418 | 0.3085 |
| <b>methhis3</b> | 3-Methylhistidine                           | 1.12 [1.00, 1.24] | 0.0458 | 0.3112 |
| <b>fat</b>      | Total Fat                                   | 1.11 [1.00, 1.24] | 0.0487 | 0.3112 |
| <b>mfa161</b>   | MUFA 16:1<br>(palmitoleic acid)             | 1.12 [1.00, 1.25] | 0.0491 | 0.3112 |
| <b>alanine</b>  | Alanine                                     | 1.11 [1.00, 1.23] | 0.0545 | 0.3297 |
| <b>mfa141</b>   | MUFA 14:1<br>(myristoleic acid)             | 1.11 [1.00, 1.23] | 0.0576 | 0.3333 |
| <b>delttoco</b> | Delta-Tocopherol                            | 1.10 [0.99, 1.23] | 0.0667 | 0.3632 |
| <b>potass</b>   | Potassium                                   | 0.91 [0.81, 1.01] | 0.0683 | 0.3632 |
| <b>magnes</b>   | Magnesium                                   | 0.91 [0.81, 1.01] | 0.0715 | 0.366  |
| <b>carbo</b>    | Total Carbohydrate                          | 0.91 [0.81, 1.01] | 0.0751 | 0.3697 |
| <b>veg5day</b>  | Daily Vegetable Consump<br>(5-A-Day Method) | 0.91 [0.82, 1.02] | 0.0991 | 0.4706 |
| <b>pfa204</b>   | PUFA 20:4<br>(arachidonic acid)             | 1.09 [0.98, 1.21] | 0.1104 | 0.5065 |
| <b>frtsumm</b>  | Daily Fruit Consump<br>(Summation Method)   | 0.92 [0.82, 1.02] | 0.1144 | 0.507  |
| <b>recno</b>    | Record Num                                  | 0.92 [0.83, 1.02] | 0.1182 | 0.507  |
| <b>pectins</b>  | Pectins                                     | 0.92 [0.83, 1.02] | 0.1251 | 0.5199 |
| <b>phosphor</b> | Phosphorus                                  | 0.93 [0.84, 1.02] | 0.1305 | 0.5261 |
| <b>fiber</b>    | Total Dietary Fiber                         | 0.93 [0.83, 1.03] | 0.1619 | 0.6231 |
| <b>sucpoly</b>  | Sucrose polyester                           | 0.88 [0.73, 1.06] | 0.1721 | 0.6231 |
| <b>glycine</b>  | Glycine                                     | 1.08 [0.97, 1.20] | 0.1758 | 0.6231 |
| <b>fibh2o</b>   | Soluble Dietary Fiber                       | 0.93 [0.84, 1.03] | 0.1804 | 0.6231 |
| <b>pfa226</b>   | PUFA 22:6<br>(docosahexaenoic acid [DHA])   | 0.93 [0.84, 1.03] | 0.1873 | 0.6231 |
| <b>lutzeax</b>  | Lutein + Zeaxanthin                         | 0.93 [0.84, 1.04] | 0.1896 | 0.6231 |
| <b>vegsumm</b>  | Daily Vegetable Consump<br>(Summation Meth) | 0.93 [0.83, 1.04] | 0.1927 | 0.6231 |

|                 |                                                            |                   |        |        |
|-----------------|------------------------------------------------------------|-------------------|--------|--------|
| <b>frt5day</b>  | Daily Fruit Consump<br>(5-A-Day Method)                    | 0.93 [0.83, 1.04] | 0.1957 | 0.6231 |
| <b>lycopene</b> | Lycopene                                                   | 1.07 [0.96, 1.19] | 0.1968 | 0.6231 |
| <b>addsugar</b> | Added Sugars                                               | 1.07 [0.96, 1.18] | 0.2146 | 0.6557 |
| <b>niacin</b>   | Niacin<br>(vitamin B3)                                     | 1.07 [0.96, 1.18] | 0.2239 | 0.6557 |
| <b>pfatot</b>   | Total Polyunsaturated Fatty Acids<br>(PUFA)                | 1.07 [0.96, 1.18] | 0.2254 | 0.6557 |
| <b>threonin</b> | Threonine                                                  | 1.07 [0.96, 1.19] | 0.2305 | 0.6557 |
| <b>lactose</b>  | Lactose                                                    | 0.94 [0.85, 1.04] | 0.2366 | 0.6557 |
| <b>vitk</b>     | Vitamin K<br>(phylloquinone)                               | 0.94 [0.84, 1.04] | 0.2412 | 0.6557 |
| <b>vita_rae</b> | Total Vitamin A Activity<br>(Retinol Activity Equivalents) | 0.94 [0.85, 1.04] | 0.2416 | 0.6557 |
| <b>mangan</b>   | Manganese                                                  | 0.94 [0.84, 1.05] | 0.2568 | 0.676  |
| <b>histidin</b> | Histidine                                                  | 1.06 [0.96, 1.18] | 0.2592 | 0.676  |
| <b>proline</b>  | Proline                                                    | 0.95 [0.85, 1.05] | 0.2931 | 0.7496 |
| <b>fibinso</b>  | Insoluble Dietary Fiber                                    | 0.95 [0.85, 1.05] | 0.3056 | 0.767  |
| <b>betatoco</b> | Beta-Tocopherol                                            | 1.05 [0.95, 1.17] | 0.3291 | 0.8106 |
| <b>oxalic</b>   | Oxalic Acid                                                | 0.95 [0.86, 1.06] | 0.3502 | 0.8466 |
| <b>pfa182</b>   | PUFA 18:2<br>(linoleic acid)                               | 1.05 [0.95, 1.16] | 0.361  | 0.8466 |
| <b>totsugar</b> | Total Sugars                                               | 0.95 [0.86, 1.06] | 0.3667 | 0.8466 |
| <b>arginine</b> | Arginine                                                   | 1.05 [0.94, 1.17] | 0.3692 | 0.8466 |
| <b>betacryp</b> | Beta-Cryptoxanthin<br>(provitamin A carotenoid)            | 0.95 [0.86, 1.06] | 0.3821 | 0.85   |
| <b>pfa183</b>   | PUFA 18:3<br>(linolenic acid)                              | 1.05 [0.94, 1.16] | 0.3835 | 0.85   |
| <b>glac</b>     |                                                            | 0.96 [0.86, 1.06] | 0.4194 | 0.8714 |
| <b>biochana</b> | Biochanin A                                                | 1.04 [0.94, 1.16] | 0.425  | 0.8714 |
| <b>caffeine</b> | Caffeine                                                   | 1.04 [0.94, 1.16] | 0.4268 | 0.8714 |
| <b>sucrose</b>  | Sucrose                                                    | 1.04 [0.94, 1.16] | 0.434  | 0.8714 |
| <b>maltose</b>  | Maltose                                                    | 0.96 [0.86, 1.07] | 0.4509 | 0.8714 |
| <b>niacineq</b> | Niacin Equivalent                                          | 1.04 [0.94, 1.15] | 0.4512 | 0.8714 |

|                 |                                                                  |                   |        |        |
|-----------------|------------------------------------------------------------------|-------------------|--------|--------|
| <b>vitb6</b>    | Vitamin B-6<br>(pyridoxine, pyridoxyl, & pyridoxamine)           | 0.96 [0.87, 1.07] | 0.4537 | 0.8714 |
| <b>protveg</b>  | Vegetable Protein                                                | 0.96 [0.86, 1.07] | 0.4566 | 0.8714 |
| <b>coumest</b>  | Coumestrol                                                       | 1.04 [0.94, 1.15] | 0.4568 | 0.8714 |
| <b>alптоce</b>  | Total Vitamin E Activity<br>(total alpha-tocopherol equivalents) | 1.04 [0.94, 1.16] | 0.4586 | 0.8714 |
| <b>vitd</b>     | Vitamin D<br>(calciferol)                                        | 0.96 [0.87, 1.07] | 0.4691 | 0.8787 |
| <b>methion</b>  | Methionine                                                       | 1.04 [0.93, 1.15] | 0.5057 | 0.8958 |
| <b>mfa221</b>   | MUFA 22:1<br>(erucic acid)                                       | 0.97 [0.87, 1.07] | 0.5071 | 0.8958 |
| <b>gltc</b>     |                                                                  | 0.97 [0.87, 1.07] | 0.5154 | 0.8958 |
| <b>joules</b>   | Energy<br>(kj)                                                   | 0.97 [0.87, 1.07] | 0.5305 | 0.8958 |
| <b>pfa184</b>   | PUFA 18:4<br>(parinaric acid)                                    | 0.97 [0.87, 1.07] | 0.5369 | 0.8958 |
| <b>zinc</b>     | Zinc                                                             | 1.03 [0.93, 1.15] | 0.5371 | 0.8958 |
| <b>cystine</b>  | Cystine                                                          | 0.97 [0.87, 1.07] | 0.5412 | 0.8958 |
| <b>pfa225</b>   | PUFA 22:5<br>(docosapentaenoic acid [DPA])                       | 0.97 [0.87, 1.07] | 0.5498 | 0.8958 |
| <b>fol_nat</b>  | Natural Folate<br>(food folate)                                  | 0.97 [0.87, 1.08] | 0.5505 | 0.8958 |
| <b>omega3</b>   | Omega-3 Fatty Acids                                              | 1.03 [0.93, 1.14] | 0.5521 | 0.8958 |
| <b>totfolat</b> | Total Folate                                                     | 0.97 [0.87, 1.08] | 0.5524 | 0.8958 |
| <b>calcium</b>  | Calcium                                                          | 0.97 [0.87, 1.08] | 0.559  | 0.8958 |
| <b>alphtoco</b> | Alpha-Tocopherol                                                 | 1.03 [0.93, 1.14] | 0.5756 | 0.9114 |
| <b>vita_re</b>  | Total Vitamin A Activity<br>(Retinol Equivalents)                | 0.97 [0.88, 1.08] | 0.5931 | 0.92   |
| <b>alphacar</b> | Alpha-Carotene<br>(provitamin A carotenoid)                      | 0.97 [0.87, 1.08] | 0.5987 | 0.92   |
| <b>ash</b>      | Ash                                                              | 0.97 [0.88, 1.08] | 0.6197 | 0.92   |
| <b>iron</b>     | Iron                                                             | 0.97 [0.88, 1.08] | 0.623  | 0.92   |
| <b>glutamic</b> | Glutamic Acid                                                    | 0.97 [0.88, 1.08] | 0.6237 | 0.92   |

|                 |                                            |                   |        |      |
|-----------------|--------------------------------------------|-------------------|--------|------|
| <b>vite_iu</b>  | Vitamin E<br>(International Units)<br>(IU) | 1.03 [0.92, 1.14] | 0.636  | 0.92 |
| <b>leucine</b>  | Leucine                                    | 1.02 [0.92, 1.14] | 0.6506 | 0.92 |
| <b>protanim</b> | Animal Protein                             | 1.02 [0.92, 1.14] | 0.6522 | 0.92 |
| <b>phytic</b>   | Phytic Acid                                | 0.98 [0.88, 1.09] | 0.6647 | 0.92 |
| <b>fructose</b> | Fructose                                   | 0.98 [0.88, 1.09] | 0.6803 | 0.92 |
| <b>sfa220</b>   | SFA 22:0<br>(behenic acid)                 | 0.98 [0.88, 1.08] | 0.6832 | 0.92 |
| <b>starch</b>   | Starch                                     | 1.02 [0.92, 1.13] | 0.6899 | 0.92 |
| <b>pfa205</b>   | PUFA 20:5<br>(eicosapentaenoic acid [EPA]) | 0.98 [0.88, 1.09] | 0.701  | 0.92 |
| <b>sodium</b>   | Sodium                                     | 1.02 [0.92, 1.14] | 0.7096 | 0.92 |
| <b>vitb12</b>   | Vitamin B-12<br>(cobalamin)                | 1.02 [0.92, 1.13] | 0.7137 | 0.92 |
| <b>daidzein</b> | Daidzein                                   | 1.02 [0.92, 1.13] | 0.7143 | 0.92 |
| <b>aspartic</b> | Aspartic Acid                              | 1.02 [0.92, 1.13] | 0.7151 | 0.92 |
| <b>pantothe</b> | Pantothenic acid                           | 1.02 [0.92, 1.13] | 0.7155 | 0.92 |
| <b>fol_deqv</b> | Dietary Folate Equivalents                 | 0.98 [0.88, 1.09] | 0.72   | 0.92 |
| <b>alcohol</b>  | Alcohol                                    | 0.98 [0.88, 1.09] | 0.7289 | 0.92 |
| <b>genistn</b>  | Genistein                                  | 0.98 [0.89, 1.09] | 0.7316 | 0.92 |
| <b>lysine</b>   | Lysine                                     | 1.02 [0.92, 1.13] | 0.7388 | 0.92 |
| <b>vitc</b>     | Vitamin C<br>(ascorbic acid)               | 0.98 [0.88, 1.09] | 0.7438 | 0.92 |
| <b>formontn</b> | Formononetin                               | 0.98 [0.88, 1.09] | 0.7482 | 0.92 |
| <b>betacar</b>  | Beta-Carotene<br>(provitamin A carotenoid) | 0.98 [0.88, 1.09] | 0.7609 | 0.92 |
| <b>isoleuc</b>  | Isoleucine                                 | 1.02 [0.92, 1.13] | 0.7656 | 0.92 |
| <b>phenylal</b> | Phenylalanine                              | 1.02 [0.92, 1.13] | 0.7681 | 0.92 |
| <b>thiamin</b>  | Thiamin<br>(vitamin B1)                    | 1.02 [0.91, 1.13] | 0.7806 | 0.92 |
| <b>fol_syn</b>  | Synthetic Folate<br>(folic acid)           | 1.01 [0.91, 1.13] | 0.7876 | 0.92 |
| <b>retinol</b>  | Retinol                                    | 1.01 [0.91, 1.13] | 0.7926 | 0.92 |

|                 |                                                                                 |                   |        |        |
|-----------------|---------------------------------------------------------------------------------|-------------------|--------|--------|
| <b>protein</b>  | Total Protein                                                                   | 1.01 [0.91, 1.13] | 0.7955 | 0.92   |
| <b>sfa200</b>   | SFA 20:0<br>(arachidic acid)                                                    | 1.01 [0.92, 1.12] | 0.814  | 0.9276 |
| <b>natoco</b>   | Natural Alpha-Tocopherol<br>(RRR-alpha-tocopherol or d-alpha-tocopherol)        | 0.99 [0.89, 1.10] | 0.819  | 0.9276 |
| <b>water</b>    | Water                                                                           | 1.01 [0.91, 1.13] | 0.823  | 0.9276 |
| <b>valine</b>   | Valine                                                                          | 1.01 [0.91, 1.12] | 0.8308 | 0.9286 |
| <b>ribofla</b>  | Riboflavin<br>(vitamin B2)                                                      | 0.99 [0.89, 1.10] | 0.8685 | 0.9626 |
| <b>aspartam</b> | Aspartame                                                                       | 0.99 [0.82, 1.19] | 0.8892 | 0.9737 |
| <b>glycitr</b>  | Glycitein                                                                       | 0.99 [0.90, 1.10] | 0.8932 | 0.9737 |
| <b>tryptoph</b> | Tryptophan                                                                      | 1.01 [0.91, 1.12] | 0.9067 | 0.9804 |
| <b>grams</b>    | Total Grams                                                                     | 1.00 [0.90, 1.12] | 0.9321 | 0.9934 |
| <b>mfa201</b>   | MUFA 20:1<br>(gadoleic acid)                                                    | 1.00 [0.91, 1.11] | 0.9388 | 0.9934 |
| <b>selenium</b> | Selenium                                                                        | 1.00 [0.90, 1.11] | 0.9465 | 0.9934 |
| <b>galactos</b> | Galactose                                                                       | 1.00 [0.91, 1.11] | 0.9511 | 0.9934 |
| <b>serine</b>   | Serine                                                                          | 1.00 [0.90, 1.11] | 0.9561 | 0.9934 |
| <b>copper</b>   | Copper                                                                          | 1.00 [0.90, 1.11] | 0.9682 | 0.9951 |
| <b>satoco</b>   | Synthetic Alpha-Tocopherol<br>(all rac-alpha-tocopherol or dl-alpha-tocopherol) | 1.00 [0.88, 1.13] | 0.9798 | 0.9951 |
| <b>glucose</b>  | Glucose                                                                         | 1.00 [0.90, 1.11] | 0.9801 | 0.9951 |
| <b>vita_iu</b>  | Total Vitamin A Activity<br>(International Units)<br>(IU)                       | 1.00 [0.90, 1.11] | 0.9935 | 0.9966 |
| <b>tyrosine</b> | Tyrosine                                                                        | 1.00 [0.90, 1.11] | 0.9966 | 0.9966 |
