# Supplementary material
Source: PubMed Central journal article supplement (PMC6685438)
Supplement: NIHMS1029018-supplement-Table2.pdf [file NIHMS1029018-supplement-Table2.pdf]

supplemental table 2x

| Nutrition       | Nutrition_label                                                                     | Hazard_Ratio_CI   | p_val   | ad_pval |
|-----------------|-------------------------------------------------------------------------------------|-------------------|---------|---------|
| <b>satoco</b>   | Synthetic Alpha-Tocopherol<br>(all rac-alpha-tocopherol or dl-alpha-tocopherol)     | 3.26 [1.93, 5.49] | < 0.001 | < 0.001 |
| <b>sucpoly</b>  | Sucrose polyester                                                                   | 1.06 [1.03, 1.08] | < 0.001 | < 0.001 |
| <b>aspartam</b> | Aspartame                                                                           | 1.06 [1.03, 1.08] | < 0.001 | < 0.001 |
| <b>cholest</b>  | Cholesterol                                                                         | 2.29 [1.38, 3.78] | 0.0013  | 0.0372  |
| <b>tfa161t</b>  | TRANS 16:1<br>(trans-hexadecenoic acid)                                             | 2.22 [1.36, 3.63] | 0.0014  | 0.0372  |
| <b>sfa180</b>   | SFA 18:0<br>(stearic acid)                                                          | 2.25 [1.35, 3.77] | 0.002   | 0.0416  |
| <b>totaltfa</b> | Total Trans-Fatty Acids<br>(TRANS)                                                  | 2.24 [1.34, 3.75] | 0.0022  | 0.0416  |
| <b>tfa181t</b>  | TRANS 18:1<br>(trans-octadecenoic acid [elaidic acid])                              | 2.03 [1.21, 3.40] | 0.0072  | 0.1198  |
| <b>sfa170</b>   | SFA 17:0<br>(margaric acid)                                                         | 2.12 [1.20, 3.75] | 0.0094  | 0.1388  |
| <b>tfa182t</b>  | TRANS 18:2<br>(trans-octadecadienoic acid [linolelaidic acid]; incl. c-t, t-c, t-t) | 1.98 [1.17, 3.35] | 0.0105  | 0.1391  |
| <b>gammtoco</b> | Gamma-Tocopherol                                                                    | 1.84 [1.14, 2.98] | 0.0121  | 0.1462  |
| <b>sfatot</b>   | Total Saturated Fatty Acids<br>(SFA)                                                | 1.77 [1.04, 3.01] | 0.0343  | 0.3698  |
| <b>sfa140</b>   | SFA 14:0<br>(myristic acid)                                                         | 1.73 [1.04, 2.90] | 0.0361  | 0.3698  |
| <b>methhis3</b> | 3-Methylhistidine                                                                   | 1.69 [1.00, 2.85] | 0.0495  | 0.4497  |
| <b>sfa160</b>   | SFA 16:0<br>(palmitic acid)                                                         | 1.69 [0.99, 2.90] | 0.054   | 0.4497  |
| <b>sfa60</b>    | SFA 6:0<br>(caproic acid)                                                           | 1.63 [0.99, 2.68] | 0.0541  | 0.4497  |
| <b>delttoco</b> | Delta-Tocopherol                                                                    | 1.66 [0.98, 2.81] | 0.0615  | 0.4706  |
| <b>sfa120</b>   | SFA 12:0<br>(lauric acid)                                                           | 1.60 [0.97, 2.61] | 0.0637  | 0.4706  |

|                 |                                             |                   |        |        |
|-----------------|---------------------------------------------|-------------------|--------|--------|
| <b>pfa226</b>   | PUFA 22:6<br>(docosahexaenoic acid [DHA])   | 0.67 [0.43, 1.03] | 0.0689 | 0.4826 |
| <b>addsugar</b> | Added Sugars                                | 1.56 [0.96, 2.55] | 0.0728 | 0.4844 |
| <b>magnes</b>   | Magnesium                                   | 0.65 [0.40, 1.06] | 0.0845 | 0.524  |
| <b>alanine</b>  | Alanine                                     | 1.53 [0.94, 2.49] | 0.0867 | 0.524  |
| <b>frtsumm</b>  | Daily Fruit Consump<br>(Summation Method)   | 0.68 [0.42, 1.09] | 0.1079 | 0.6238 |
| <b>potass</b>   | Potassium                                   | 0.68 [0.41, 1.11] | 0.1259 | 0.6863 |
| <b>glycine</b>  | Glycine                                     | 1.50 [0.89, 2.52] | 0.129  | 0.6863 |
| <b>recno</b>    | Record Num                                  | 0.73 [0.48, 1.11] | 0.1455 | 0.7046 |
| <b>histidin</b> | Histidine                                   | 1.44 [0.88, 2.37] | 0.1466 | 0.7046 |
| <b>tryptoph</b> | Tryptophan                                  | 1.42 [0.88, 2.29] | 0.1483 | 0.7046 |
| <b>mfa221</b>   | MUFA 22:1<br>(erucic acid)                  | 0.72 [0.45, 1.16] | 0.1818 | 0.7572 |
| <b>threonin</b> | Threonine                                   | 1.39 [0.85, 2.24] | 0.1862 | 0.7572 |
| <b>lycopene</b> | Lycopene                                    | 1.38 [0.85, 2.25] | 0.1929 | 0.7572 |
| <b>pfa225</b>   | PUFA 22:5<br>(docosapentaenoic acid [DPA])  | 0.74 [0.47, 1.17] | 0.2028 | 0.7572 |
| <b>sfa80</b>    | SFA 8:0<br>(caprylic acid)                  | 1.38 [0.83, 2.28] | 0.2092 | 0.7572 |
| <b>pfa204</b>   | PUFA 20:4<br>(arachidonic acid)             | 1.36 [0.84, 2.20] | 0.2143 | 0.7572 |
| <b>carbo</b>    | Total Carbohydrate                          | 0.74 [0.46, 1.19] | 0.2149 | 0.7572 |
| <b>sfa100</b>   | SFA 10:0<br>(capric acid)                   | 1.37 [0.83, 2.28] | 0.2168 | 0.7572 |
| <b>mfatot</b>   | Total Monounsaturated Fatty Acids<br>(MUFA) | 1.41 [0.82, 2.44] | 0.217  | 0.7572 |
| <b>fiber</b>    | Total Dietary Fiber                         | 0.73 [0.44, 1.21] | 0.2297 | 0.7572 |
| <b>mfa181</b>   | MUFA 18:1<br>(oleic acid)                   | 1.40 [0.81, 2.44] | 0.2302 | 0.7572 |
| <b>lutzeax</b>  | Lutein + Zeaxanthin                         | 0.74 [0.46, 1.21] | 0.2314 | 0.7572 |
| <b>sfa40</b>    | SFA 4:0<br>(butyric acid)                   | 1.36 [0.82, 2.26] | 0.2334 | 0.7572 |

|                 |                                                                  |                   |        |        |
|-----------------|------------------------------------------------------------------|-------------------|--------|--------|
| <b>mfa161</b>   | MUFA 16:1<br>(palmitoleic acid)                                  | 1.37 [0.80, 2.36] | 0.2555 | 0.78   |
| <b>veg5day</b>  | Daily Vegetable Consump<br>(5-A-Day Method)                      | 0.76 [0.47, 1.22] | 0.2566 | 0.78   |
| <b>frt5day</b>  | Daily Fruit Consump<br>(5-A-Day Method)                          | 0.75 [0.45, 1.24] | 0.258  | 0.78   |
| <b>mfa201</b>   | MUFA 20:1<br>(gadoleic acid)                                     | 1.31 [0.81, 2.14] | 0.2718 | 0.7807 |
| <b>lysine</b>   | Lysine                                                           | 1.31 [0.81, 2.12] | 0.2774 | 0.7807 |
| <b>protanim</b> | Animal Protein                                                   | 1.31 [0.80, 2.14] | 0.2803 | 0.7807 |
| <b>aspartic</b> | Aspartic Acid                                                    | 1.30 [0.81, 2.09] | 0.2817 | 0.7807 |
| <b>methion</b>  | Methionine                                                       | 1.30 [0.79, 2.13] | 0.2982 | 0.7837 |
| <b>zinc</b>     | Zinc                                                             | 1.28 [0.80, 2.04] | 0.3121 | 0.7837 |
| <b>joules</b>   | Energy<br>(kj)                                                   | 0.79 [0.49, 1.27] | 0.3275 | 0.7837 |
| <b>alптоce</b>  | Total Vitamin E Activity<br>(total alpha-tocopherol equivalents) | 1.27 [0.79, 2.05] | 0.328  | 0.7837 |
| <b>vita_rae</b> | Total Vitamin A Activity<br>(Retinol Activity Equivalents)       | 0.79 [0.50, 1.26] | 0.329  | 0.7837 |
| <b>phenylal</b> | Phenylalanine                                                    | 1.27 [0.78, 2.05] | 0.3311 | 0.7837 |
| <b>mfa141</b>   | MUFA 14:1<br>(myristoleic acid)                                  | 1.30 [0.75, 2.26] | 0.346  | 0.7837 |
| <b>pantothe</b> | Pantothenic acid                                                 | 1.25 [0.78, 2.01] | 0.348  | 0.7837 |
| <b>leucine</b>  | Leucine                                                          | 1.26 [0.77, 2.05] | 0.3561 | 0.7837 |
| <b>phosphor</b> | Phosphorus                                                       | 0.80 [0.50, 1.29] | 0.3609 | 0.7837 |
| <b>oxalic</b>   | Oxalic Acid                                                      | 0.80 [0.50, 1.29] | 0.3642 | 0.7837 |
| <b>sfa220</b>   | SFA 22:0<br>(behenic acid)                                       | 0.82 [0.52, 1.28] | 0.3775 | 0.7837 |
| <b>pfatot</b>   | Total Polyunsaturated Fatty Acids<br>(PUFA)                      | 1.24 [0.77, 2.00] | 0.3801 | 0.7837 |
| <b>fibinso</b>  | Insoluble Dietary Fiber                                          | 0.80 [0.48, 1.32] | 0.381  | 0.7837 |

|                 |                                                           |                   |        |        |
|-----------------|-----------------------------------------------------------|-------------------|--------|--------|
| <b>vite_iu</b>  | Vitamin E<br>(International Units)<br>(IU)                | 1.23 [0.77, 1.96] | 0.3825 | 0.7837 |
| <b>biochana</b> | Biochanin A                                               | 1.25 [0.75, 2.07] | 0.389  | 0.7837 |
| <b>totsugar</b> | Total Sugars                                              | 0.81 [0.49, 1.32] | 0.3913 | 0.7837 |
| <b>lactose</b>  | Lactose                                                   | 0.80 [0.47, 1.35] | 0.3989 | 0.7837 |
| <b>fibh2o</b>   | Soluble Dietary Fiber                                     | 0.80 [0.48, 1.34] | 0.3995 | 0.7837 |
| <b>vita_iu</b>  | Total Vitamin A Activity<br>(International Units)<br>(IU) | 1.22 [0.76, 1.98] | 0.4078 | 0.7837 |
| <b>phytic</b>   | Phytic Acid                                               | 0.81 [0.50, 1.33] | 0.4101 | 0.7837 |
| <b>glucose</b>  | Glucose                                                   | 1.24 [0.74, 2.06] | 0.4125 | 0.7837 |
| <b>ribofla</b>  | Riboflavin<br>(vitamin B2)                                | 0.83 [0.52, 1.32] | 0.4298 | 0.7956 |
| <b>alphacar</b> | Alpha-Carotene<br>(provitamin A carotenoid)               | 0.82 [0.50, 1.35] | 0.4307 | 0.7956 |
| <b>vitb6</b>    | Vitamin B-6<br>(pyridoxine, pyridoxyl, & pyridoxamine)    | 0.83 [0.52, 1.33] | 0.4416 | 0.8005 |
| <b>pfa182</b>   | PUFA 18:2<br>(linoleic acid)                              | 1.19 [0.76, 1.87] | 0.4475 | 0.8005 |
| <b>sucrose</b>  | Sucrose                                                   | 1.19 [0.76, 1.87] | 0.4514 | 0.8005 |
| <b>isoleuc</b>  | Isoleucine                                                | 1.20 [0.74, 1.93] | 0.4581 | 0.8016 |
| <b>vegsumm</b>  | Daily Vegetable Consump<br>(Summation Meth)               | 0.86 [0.54, 1.36] | 0.5122 | 0.8638 |
| <b>pfa184</b>   | PUFA 18:4<br>(parinaric acid)                             | 0.86 [0.54, 1.36] | 0.5123 | 0.8638 |
| <b>alptoco</b>  | Alpha-Tocopherol                                          | 1.17 [0.73, 1.85] | 0.5173 | 0.8638 |
| <b>pectins</b>  | Pectins                                                   | 0.85 [0.53, 1.38] | 0.5196 | 0.8638 |
| <b>retinol</b>  | Retinol                                                   | 1.17 [0.73, 1.87] | 0.5262 | 0.864  |
| <b>caffeine</b> | Caffeine                                                  | 1.16 [0.73, 1.84] | 0.5366 | 0.8704 |
| <b>gltc</b>     |                                                           | 0.87 [0.54, 1.39] | 0.5608 | 0.8944 |
| <b>arginine</b> | Arginine                                                  | 1.16 [0.70, 1.94] | 0.565  | 0.8944 |
| <b>omega3</b>   | Omega-3 Fatty Acids                                       | 1.14 [0.72, 1.83] | 0.5754 | 0.8944 |

|                 |                                                                          |                   |        |        |
|-----------------|--------------------------------------------------------------------------|-------------------|--------|--------|
| <b>betacryp</b> | Beta-Cryptoxanthin<br>(provitamin A carotenoid)                          | 0.87 [0.54, 1.42] | 0.5855 | 0.8944 |
| <b>protveg</b>  | Vegetable Protein                                                        | 1.15 [0.68, 1.96] | 0.5933 | 0.8944 |
| <b>protein</b>  | Total Protein                                                            | 1.14 [0.71, 1.83] | 0.5965 | 0.8944 |
| <b>vitk</b>     | Vitamin K<br>(phylloquinone)                                             | 0.87 [0.51, 1.47] | 0.5991 | 0.8944 |
| <b>tyrosine</b> | Tyrosine                                                                 | 1.14 [0.70, 1.85] | 0.6052 | 0.8944 |
| <b>ash</b>      | Ash                                                                      | 1.13 [0.71, 1.80] | 0.6166 | 0.9012 |
| <b>niacin</b>   | Niacin<br>(vitamin B3)                                                   | 1.12 [0.71, 1.75] | 0.6299 | 0.9106 |
| <b>proline</b>  | Proline                                                                  | 0.89 [0.55, 1.45] | 0.651  | 0.9234 |
| <b>glutamic</b> | Glutamic Acid                                                            | 0.90 [0.56, 1.44] | 0.6526 | 0.9234 |
| <b>copper</b>   | Copper                                                                   | 1.12 [0.67, 1.86] | 0.6606 | 0.9248 |
| <b>vitb12</b>   | Vitamin B-12<br>(cobalamin)                                              | 1.10 [0.69, 1.75] | 0.6804 | 0.9256 |
| <b>mangan</b>   | Manganese                                                                | 0.90 [0.54, 1.49] | 0.6811 | 0.9256 |
| <b>totfolat</b> | Total Folate                                                             | 0.91 [0.56, 1.46] | 0.6834 | 0.9256 |
| <b>serine</b>   | Serine                                                                   | 1.10 [0.68, 1.78] | 0.6889 | 0.9256 |
| <b>coumest</b>  | Coumestrol                                                               | 1.10 [0.68, 1.77] | 0.6972 | 0.9273 |
| <b>iron</b>     | Iron                                                                     | 0.91 [0.57, 1.47] | 0.7104 | 0.9355 |
| <b>vitc</b>     | Vitamin C<br>(ascorbic acid)                                             | 1.09 [0.68, 1.74] | 0.72   | 0.9388 |
| <b>pfa205</b>   | PUFA 20:5<br>(eicosapentaenoic acid [EPA])                               | 0.93 [0.59, 1.47] | 0.7482 | 0.958  |
| <b>glac</b>     |                                                                          | 0.93 [0.58, 1.49] | 0.7552 | 0.958  |
| <b>vitd</b>     | Vitamin D<br>(calciferol)                                                | 0.92 [0.56, 1.53] | 0.7579 | 0.958  |
| <b>maltose</b>  | Maltose                                                                  | 0.93 [0.57, 1.51] | 0.7635 | 0.958  |
| <b>valine</b>   | Valine                                                                   | 1.07 [0.67, 1.71] | 0.7861 | 0.9712 |
| <b>betatoco</b> | Beta-Tocopherol                                                          | 1.07 [0.65, 1.77] | 0.7887 | 0.9712 |
| <b>natoco</b>   | Natural Alpha-Tocopherol<br>(RRR-alpha-tocopherol or d-alpha-tocopherol) | 0.94 [0.57, 1.57] | 0.8247 | 0.9867 |
| <b>calcium</b>  | Calcium                                                                  | 1.05 [0.67, 1.66] | 0.8253 | 0.9867 |
| <b>daidzein</b> | Daidzein                                                                 | 0.96 [0.62, 1.48] | 0.8384 | 0.9867 |

|                 |                                                   |                   |        |        |
|-----------------|---------------------------------------------------|-------------------|--------|--------|
| <b>fol_syn</b>  | Synthetic Folate<br>(folic acid)                  | 1.04 [0.66, 1.64] | 0.8691 | 0.9867 |
| <b>genistn</b>  | Genistein                                         | 1.04 [0.65, 1.64] | 0.8821 | 0.9867 |
| <b>glycitn</b>  | Glycitein                                         | 0.97 [0.61, 1.53] | 0.883  | 0.9867 |
| <b>water</b>    | Water                                             | 1.04 [0.65, 1.66] | 0.8859 | 0.9867 |
| <b>betacar</b>  | Beta-Carotene<br>(provitamin A carotenoid)        | 1.04 [0.63, 1.70] | 0.8884 | 0.9867 |
| <b>vita_re</b>  | Total Vitamin A Activity<br>(Retinol Equivalents) | 1.03 [0.64, 1.66] | 0.8897 | 0.9867 |
| <b>starch</b>   | Starch                                            | 0.97 [0.59, 1.58] | 0.8899 | 0.9867 |
| <b>fol_nat</b>  | Natural Folate<br>(food folate)                   | 0.97 [0.61, 1.54] | 0.9036 | 0.9867 |
| <b>selenium</b> | Selenium                                          | 0.97 [0.59, 1.60] | 0.9039 | 0.9867 |
| <b>pfa183</b>   | PUFA 18:3<br>(linolenic acid)                     | 1.03 [0.64, 1.65] | 0.9102 | 0.9867 |
| <b>cystine</b>  | Cystine                                           | 1.02 [0.64, 1.65] | 0.9203 | 0.9867 |
| <b>niacineq</b> | Niacin Equivalents                                | 1.02 [0.66, 1.58] | 0.9257 | 0.9867 |
| <b>fat</b>      | Total Fat                                         | 0.98 [0.57, 1.69] | 0.9344 | 0.9867 |
| <b>formontn</b> | Formononetin                                      | 1.02 [0.64, 1.64] | 0.935  | 0.9867 |
| <b>galactos</b> | Galactose                                         | 1.02 [0.62, 1.68] | 0.9389 | 0.9867 |
| <b>grams</b>    | Total Grams                                       | 1.02 [0.63, 1.63] | 0.9462 | 0.9867 |
| <b>sfa200</b>   | SFA 20:0<br>(arachidic acid)                      | 0.99 [0.61, 1.61] | 0.9593 | 0.9867 |
| <b>fructose</b> | Fructose                                          | 0.99 [0.60, 1.64] | 0.9621 | 0.9867 |
| <b>thiamin</b>  | Thiamin<br>(vitamin B1)                           | 1.01 [0.62, 1.65] | 0.9645 | 0.9867 |
| <b>fol_deqv</b> | Dietary Folate Equivalents                        | 1.01 [0.63, 1.61] | 0.9742 | 0.9891 |
| <b>alcohol</b>  | Alcohol                                           | 1.00 [0.62, 1.60] | 0.9937 | 0.9974 |
| <b>sodium</b>   | Sodium                                            | 1.00 [0.61, 1.65] | 0.9974 | 0.9974 |
